# Supplementary material
Source: publisher figshare collection journal article supplement (https://karger.figshare.com/ndownloader/files/25445144)
Supplement: Supplementary file 1 [file 25445144]

**Figure 1. Distribution of costs (in the European currency, €) between laparoscopic and open surgery**
